# Supplementary material for: Genetic effects of FASN, PPARGC1A, ABCG2 and IGF1 revealing the association with milk fatty acids in a Chinese Holstein cattle population based on a post genome-wide association study
Source: PubMed Central journal article supplement (PMC4963957; doi:10.1186/s12863-016-0418-x), 2016-07-28
Supplement: 12863_2016_418_MOESM1_ESM.pdf [file 12863_2016_418_MOESM1_ESM.pdf]

1 Additional file1: Table S1. Primers used to identify SNPs in the *FASN* gene

| Serial no | Primer name | Primer sequences                                 | Product size | Annealing temperature |
|-----------|-------------|--------------------------------------------------|--------------|-----------------------|
| 1         | Exon-1      | L-TCTTTGTTGCAGGGCTTTCT<br>R-TAGCCCAGAGCCTTCTGGTA | 499 bp       | 59 °C                 |
| 2         | Exon-2      | L-AAGCTGGTTTACTCCCTCA<br>R-CATATTGTGTGCCTGCTTGG  | 471 bp       | 59 °C                 |
| 3         | Exon-3      | L-GGAGAATCCCATGGACAGAA<br>R-CTGGAAGGGTCTCAGCTGTC | 454 bp       | 59 °C                 |
| 4         | Exon-4      | L-GCCCTTTTGTCTGACTCG<br>R-TGATGCATCGAAAACTTGC    | 423 bp       | 60 °C                 |
| 5         | Exon-5      | L-TTCGATGCATCAGGTGAGAG<br>R-CAACGTACTCCAGGGTCTCC | 427 bp       | 58 °C                 |
| 6         | Exon-6/7    | L-GATGGCTGCAAAGAGAAAGG<br>R-AATGTCTGGCCCTGTGAAAC | 615 bp       | 59 °C                 |
| 7         | Exon-8      | L-GCTTTGGGGGAGAATGAAAT<br>R-CGGAGCAGATGAACCAGAGT | 615 bp       | 60 °C                 |
| 8         | Exon-9/10   | L-CGCCACTCTGGTTCATC<br>R-AGCGCCAACACAGAAAGG      | 696 bp**     | 58 °C                 |
| 9         | Exon-11/12  | L-CCTTTGAGGCTCTCTTCTGC<br>R-CACCAGGTTGTTACGTTGT  | 615 bp**     | 54 °C                 |
| 10        | Exon-13     | L-CATGGCGTTCCACTCCTACT<br>R-TGTCCCTGTGGTCCTTCTTC | 545 bp       | 57 °C                 |
| 11        | Exon-14     | L-GCCGAGTACAACGTGAACAA<br>R-AACTCCACAGGTGGGAACAG | 616 bp       | 58 °C                 |
| 12        | Exon-15/16  | L-AAGCAGACCTCTGGGTGCT<br>R-CATAGCTTGAGCCACCTTCC  | 630 bp       | 60 °C                 |
| 13        | Exon-17/18  | L-GAAGGTGGCTCAAGCTATGG<br>R-GCCAGGCTAGGTCTCTTCCT | 595 bp**     | 56 °C                 |
| 14        | Exon-19     | L-GGTCCCCTTTGTGTTTTGG<br>R-TTATTACCACGTCGGCCACT  | 422 bp       | 58 °C                 |
| 15        | Exon-20     | L-GTACACGCTGCAGGACAAGA<br>R-GGTAGACCCACACGTAGGA  | 406 bp       | 60 °C                 |
| 16        | Exon-21     | L-CTGAGGCTCTTCCCTGACAT<br>R-CCGATTCTGCAGAGGTCATT | 560 bp**     | 60 °C                 |
| 17        | Exon-22     | L-AAGCCTATTCCATCCCAGGT<br>R-CTGTGAGTTGAGGGGGTCAG | 495 bp       | 60 °C                 |
| 18        | Exon-23/24  | L-CTGACCCCTCAACTCACAG<br>R-CCCCATCACGGTAGACATTC  | 627 bp       | 56 °C                 |
| 19        | Exon-25     | L-GTGGGCTTGGTGAAGTGTCT<br>R-TAGGGGGTGACAGAAAGTGG | 434 bp       | 59 °C                 |
| 20        | Exon-26/27  | L-CTTCCCCTGGAACAAGGTG                            | 502 bp**     | 59 °C                 |

---

|    |            |                                                   |          |       |
|----|------------|---------------------------------------------------|----------|-------|
|    |            | R-CCTGACCTCACTGGGAGGAG                            |          |       |
| 21 | Exon-28/29 | L-ACCCAACAGTGCTCAGGAAC<br>R-TGCTGCTCAAAGGATGTGTC  | 674 bp** | 57 °C |
| 22 | Exon-30    | L-GCCGTGTTTTCCCACTTGT<br>R-GGTCCCCATAGTGAAGGTCA   | 405 bp   | 54 °C |
| 23 | Exon-31/32 | L-CGGGCTGTGACCTTCACTAT<br>R-CCTGCTCTTCCTCACGTACC  | 624 bp   | 58 °C |
| 24 | Exon-33/34 | L-GGCAAAGTGGTCATTCAGGT<br>R-GCCTTTGGAGGGCTTCTTAG  | 654 bp   | 59 °C |
| 25 | Exon-35    | L-GTGGTGAGGACGGCTTTAGA<br>R-GGTCACCCTGTGGGTTCTTA  | 411 bp   | 59 °C |
| 26 | Exon-36/37 | L-CTTGCACTGGTGTCCAGAGA<br>R-AGACCAGACTCGGAAGACGA  | 696 bp** | 58 °C |
| 27 | Exon-38    | L-GGTACAATACCCACCCAGGA<br>R-CCTGCCACAAACACACAGAC  | 436 bp   | 59 °C |
| 28 | Exon-39    | F-AGAGCTGACGGACTCCACAC<br>R-CTGCATGAAGAAGCACATGG  | 697 bp** | 59 °C |
| 29 | Exon-40/41 | L-ACCTGCAGACAAGGGCTAAA<br>R-CAGCTTGTGGTAGAAGGAACG | 653 bp   | 59 °C |
| 30 | Exon-42    | F-CTCGCACACCTTCGTGATG<br>R-CACGTTGCCGTGGTAGGTAG   | 472 bp** | 60 °C |

---

2 Note: \*\*SNPs are detected.

3

4
